# Supplementary material
Source: publisher figshare collection journal article supplement (https://acs.figshare.com/ndownloader/files/4393708)
Supplement: Supplementary file 1 [file 4393708]

*Supporting Information*

## Selective Oxidation of Cyclohexanol and 2-Cyclohexen-1-ol on O/Au(111): The Effect of Molecular Structure

*Xiaoying Liu<sup>†</sup> and Cynthia M. Friend<sup>\*,†,‡</sup>*

Department of Chemistry and Chemical Biology, and School of Engineering and Applied Sciences, Harvard University, 12 Oxford Street, Cambridge, Massachusetts 02138

**Table S1.** Mass spectrometer fragmentation patterns for the reaction products and those from the sublimation of condensed authentic samples on the Au(111) surface

| sample                            | fragment (m/z) / intensity (normalized to parent ion) |     |    |     |     |     |
|-----------------------------------|-------------------------------------------------------|-----|----|-----|-----|-----|
|                                   | 66                                                    | 68  | 70 | 94  | 96  | 98  |
| cyclohexanone <sup>[a]</sup>      |                                                       |     | 71 |     |     | 100 |
| cyclohexanone <sup>[b]</sup>      |                                                       |     | 75 |     |     | 100 |
| 2-cyclohexen-1-one <sup>[a]</sup> |                                                       | 449 |    |     | 100 |     |
| 2-cyclohexen-1-one <sup>[b]</sup> |                                                       | 463 |    |     | 100 |     |
| phenol <sup>[a]</sup>             | 46                                                    |     |    | 100 |     |     |
| phenol <sup>[b]</sup>             | 49                                                    |     |    | 100 |     |     |

[a] The patterns were measured for the reaction products. [b] The patterns were measured for the condensed authentic samples.
